# Supplementary material for: Novel Composites Polymer Electrolytes Based on Methylcellulose-pectin Blend Complexed With Potassium Phosphate and Ethylene Carbonate
Source: Research Square preprint supplement (doi:10.21203/rs.3.rs-1860435/v1), 2022-07-26
Supplement: Supplementary file 1 [file 38b8d5378da5762b896326a1.docx]

**NOVEL COMPOSITES POLYMER ELECTROLYTES BASED ON METHYLCELLULOSE-PECTIN BLEND COMPLEXED WITH POTASSIUM PHOSPHATE AND ETHYLENE CARBONATE**

**Abdullahi Abbas Adam1,2,3*, Hassan Soleimani1, Muhammad Fadhlullah Bin Abd. Shukur1,2, John Ojur Dennis1, Yarima Mudassir Hassan1,2, Bashir Abubakar Abdulkadir1,2, Jemilat Yetunde Yusuf1, Omar Sami Sultan Ahmed2,4 Saba Ayub1, Suleiman Shuaibu Abdullahi 3**

1Department of Fundamental and Applied Sciences, Universiti Teknologi PETRONAS, Seri Iskandar, Perak 32610, Malaysia

2Centre of Innovative Nanoscience and Nanotechnology (COINN), Universiti Teknologi PETRONAS, Seri Iskandar, Perak 32610, Malaysia

3Department of Physics, Al-Qalam University Katsina, Katsina 820252, Nigeria

4Electrical and Electronics Engineering Department, Universiti Teknologi PETRONAS, Seri Iskandar, Perak 32610, Malaysia

*Correspondence: abbasabdullah17@hotmail.com

Figure S1. EIS plots of some selected MC/PC films

Figure S2. EIS plots of some selected MC/PC/K3PO4 SPE

Figure S3. EIS plots of some selected MC/PC/K3PO4/EC SPE
